# Supplementary material for: Contiguous layer based metal–organic framework with conjugated π-electron ligand for high iodine capture
Source: Royal Society of Chemistry journal article supplement (doi:10.1039/d1dt00947h), 2021-01-01
Supplement: d1dt00947h1.pdf [file d1dt00947h1.pdf]

## Electronic Supplementary Information (ESI)

### **Contiguous Layer Based Metal–Organic Framework with Conjugated $\pi$ - Electron Ligand for High Iodine Capture**

**Tong Xu, Jiantang Li, Mingwei Jia, Guanghua Li and Yunling Liu\***

*State Key Laboratory of Inorganic Synthesis and Preparative Chemistry, College of  
Chemistry, Jilin University, Changchun 130012, P. R. China*

*E-mail: zlr@jlu.edu.cn; yunling@jlu.edu.cn; Fax: +86-431-85168624; Tel: +86-431-  
85168614*

## Adsorption and Release of Iodine

The amount of iodine adsorbed on the MOFs at equilibrium was obtained using Eq. (1) The isothermal adsorption curve was linearly fitted to the Langmuir equation Eq. (2) and the Freundlich equation Eq. (3) to obtain the theoretical maximum adsorption capacity of the adsorbent for iodine.

$$(1) \quad Q_e = (C_0 - C_e) \times \frac{V}{w}$$

$$(2) \quad Q_e = \frac{Q_m k_L C_e}{1 + k_L C_e}$$

$$(3) \quad Q_e = k_F C_e^{\frac{1}{n}}$$

In the above equations,  $Q_e$  ( $\text{mg g}^{-1}$ ) is the equilibrium adsorption capacity of the adsorbent for iodine when the adsorption reaches equilibrium, and  $C_0$  ( $\text{mg L}^{-1}$ ) is the iodine concentration in the initial solution.  $C_e$  ( $\text{mg L}^{-1}$ ) is the iodine concentration in the solution when the adsorption reaches equilibrium.  $V$  (mL) is the volume of iodine solution.  $w$  (mg) is the mass of the added adsorbent.  $Q_m$  ( $\text{mg g}^{-1}$ ) is the theoretical maximum adsorption capacity of the adsorbent for iodine.  $k_L$  ( $\text{L mg}^{-1}$ ) is the Langmuir model constant, while  $k_F$  ( $\text{mg g}^{-1}$ ) is the Freundlich model constant.  $n$  is a linear constant.

## Supporting Tables

**Table S1.** Crystal data and structure refinements for compound 1.

| Compound                                                                    | Compound 1                                                                      |
|-----------------------------------------------------------------------------|---------------------------------------------------------------------------------|
| Formula                                                                     | C <sub>30</sub> H <sub>44</sub> Cu <sub>3</sub> N <sub>16</sub> O <sub>13</sub> |
| <i>M<sub>w</sub></i>                                                        | 1027.43                                                                         |
| Temp (K)                                                                    | 173(2)                                                                          |
| Wavelength (Å)                                                              | 0.71073                                                                         |
| Crystal system                                                              | Monoclinic                                                                      |
| Space group                                                                 | <i>C2/m</i>                                                                     |
| <i>a</i> (Å)                                                                | 19.7115(10)                                                                     |
| <i>b</i> (Å)                                                                | 26.1902(12)                                                                     |
| <i>c</i> (Å)                                                                | 20.0351(11)                                                                     |
| $\alpha$ (°)                                                                | 90                                                                              |
| $\beta$ (°)                                                                 | 113.054(2)                                                                      |
| $\gamma$ (°)                                                                | 90                                                                              |
| <i>V</i> (Å <sup>3</sup> )                                                  | 9517.0(8)                                                                       |
| <i>Z</i> , <i>D<sub>C</sub></i> (Mg/m <sup>3</sup> )                        | 8, 1.434                                                                        |
| <i>F</i> (000)                                                              | 4216                                                                            |
| $\theta$ range (deg)                                                        | 2.192 - 30.555                                                                  |
| reflns collected/unique                                                     | 60767 / 14851                                                                   |
| <i>R<sub>int</sub></i>                                                      | 0.0304                                                                          |
| data/restraints/params                                                      | 14851 / 2 / 398                                                                 |
| GOF on <i>F</i> <sup>2</sup>                                                | 1.119                                                                           |
| <i>R</i> <sup>1</sup> , <i>wR</i> <sup>2</sup> ( <i>I</i> > 2σ( <i>I</i> )) | 0.0474, 0.1736                                                                  |
| <i>R</i> <sup>1</sup> , <i>wR</i> <sup>2</sup> (all data)                   | 0.0536, 0.1778                                                                  |

**Table S2.** Selected bond lengths [Å] and angles [°] for compound 1.

| <b>Compound 1</b>  |            |                     |            |
|--------------------|------------|---------------------|------------|
| Cu(1)-O(1)         | 1.9081(18) | N(6)-Cu(3)-O(4)#2   | 92.68(8)   |
| Cu(1)-O(2)         | 1.9148(18) | N(6)-Cu(3)-N(9)#3   | 177.32(10) |
| Cu(1)-O(3)         | 2.276(3)   | N(6)-Cu(3)-N(11)    | 92.51(10)  |
| Cu(1)-N(5)         | 2.013(2)   | O(4)#2-Cu(3)-N(9)#3 | 88.26(9)   |
| Cu(1)-N(2)         | 2.019(2)   | N(9)#3-Cu(3)-N(11)  | 90.06(10)  |
| Cu(2)-O(1)         | 1.8981(19) | Cu(2)-O(1)-Cu(1)    | 122.72(10) |
| Cu(2)-N(3)         | 1.992(2)   | Cu(1)-O(2)-Cu(3)    | 123.20(10) |
| Cu(2)-N(8)         | 2.007(2)   | C(21)-O(3)-Cu(1)    | 128.3(2)   |
| Cu(2)-N(12)#1      | 2.005(2)   | C(21)-O(4)-Cu(3)#2  | 108.52(18) |
| Cu(3)-O(2)         | 1.9143(18) | N(3)-N(2)-Cu(1)     | 119.44(16) |
| Cu(3)-O(4)#2       | 1.9950(19) | C(4)-N(2)-Cu(1)     | 132.96(19) |
| Cu(3)-N(6)         | 1.990(2)   | N(2)-N(3)-Cu(2)     | 119.14(16) |
| Cu(3)-N(9)#3       | 1.994(2)   | C(5)-N(3)-Cu(2)     | 132.66(18) |
| Cu(3)-N(11)        | 2.235(3)   | N(6)-N(5)-Cu(1)     | 119.66(16) |
| O(1)-Cu(1)-O(2)    | 175.01(10) | C(9)-N(5)-Cu(1)     | 132.42(18) |
| O(1)-Cu(1)-O(3)    | 96.29(10)  | N(5)-N(6)-Cu(3)     | 120.32(16) |
| O(1)-Cu(1)-N(2)    | 86.29(8)   | C(10)-N(6)-Cu(3)    | 131.27(18) |
| O(1)-Cu(1)-N(5)    | 92.26(9)   | N(9)-N(8)-Cu(2)     | 123.78(16) |
| O(2)-Cu(1)-O(3)    | 88.68(10)  | C(14)-N(8)-Cu(2)    | 128.27(18) |
| O(2)-Cu(1)-N(2)    | 92.63(8)   | N(8)-N(9)-Cu(3)#1   | 120.28(16) |
| O(2)-Cu(1)-N(5)    | 87.75(8)   | C(15)-N(9)-Cu(3)#1  | 131.79(19) |
| N(2)-Cu(1)-O(3)    | 99.11(12)  | N(12)-N(11)-Cu(3)   | 121.73(18) |
| N(5)-Cu(1)-O(3)    | 93.28(12)  | C(19)-N(11)-Cu(3)   | 130.6(2)   |
| N(5)-Cu(1)-N(2)    | 167.61(11) | N(11)-N(12)-Cu(2)#3 | 118.61(18) |
| O(1)-Cu(2)-N(3)    | 87.69(9)   | C(20)-N(12)-Cu(2)#3 | 132.8(2)   |
| O(1)-Cu(2)-N(8)    | 89.93(8)   | O(4)#2-Cu(3)-N(11)  | 86.15(9)   |
| O(1)-Cu(2)-N(12)#1 | 171.89(10) | O(2)-Cu(3)-N(11)    | 98.76(9)   |
| N(3)-Cu(2)-N(8)    | 168.14(10) | O(2)-Cu(3)-N(9)#3   | 90.67(8)   |
| N(3)-Cu(2)-N(12)#1 | 92.98(9)   | O(2)-Cu(3)-N(6)     | 88.18(8)   |
| N(8)-Cu(2)-N(12)#1 | 91.01(9)   | O(2)-Cu(3)-O(4)#2   | 174.97(9)  |

Symmetry transformations used to generate equivalent atoms:

#1  $x-1/2, -y+1/2, z$  #2  $-x-1/2, -y+1/2, -z$  #3  $x+1/2, -y+1/2, z$  #4  $x, -y+1, z$  #5  $x, -y, z$   
#6  $-x, y, -z+1$  #7  $-x+1, y, -z$

**Table S3. Comparison of iodine solution adsorption in different materials.**

| Name                                                                                                                          | I <sub>2</sub> uptake (g/g) | Ref.             |
|-------------------------------------------------------------------------------------------------------------------------------|-----------------------------|------------------|
| HCOF-1                                                                                                                        | 2.1                         | 1                |
| MFM-300(Sc)                                                                                                                   | 1.54                        | 2                |
| HMTI-1                                                                                                                        | 1.5                         | 3                |
| BC@Dopa-ZIF                                                                                                                   | 1.31                        | 4                |
| MFM-300(Fe)                                                                                                                   | 1.29                        | 2                |
| UiO-66-PYDC                                                                                                                   | 1.25                        | 5                |
| {[Zn <sub>3</sub> (dl-lac) <sub>2</sub> (pybz) <sub>2</sub> ]·2.5DMF} <sub>n</sub>                                            | 1.01                        | 6                |
| MFM-300(Al)                                                                                                                   | 0.94                        | 2                |
| COF-5d                                                                                                                        | 0.91                        | 7                |
| NOP-54                                                                                                                        | 0.89                        | 8                |
| NOP-55                                                                                                                        | 0.81                        | 8                |
| Fe <sub>3</sub> O <sub>4</sub> /COF-5d                                                                                        | 0.797                       | 9                |
| [(Cu <sub>4</sub> I <sub>4</sub> )CuL <sub>2</sub> (Dabco) <sub>1.5</sub> ]·10H <sub>2</sub> O·2DMF                           | 0.77                        | 10               |
| FCMP-600@2                                                                                                                    | 0.729                       | 11               |
| FCMP-600@1                                                                                                                    | 0.55                        | 11               |
| FCMP-600@4                                                                                                                    | 0.539                       | 11               |
| FCMP-600@3                                                                                                                    | 0.52                        | 11               |
| NTP                                                                                                                           | 0.429                       | 12               |
| Cd <sub>3</sub> (TBP) <sub>4</sub>                                                                                            | 0.438                       | 13               |
| MIL-101-NH <sub>2</sub>                                                                                                       | 0.311                       | 14               |
| JLU-Liu32                                                                                                                     | 0.29                        | 15               |
| {[Mn <sub>2</sub> (oxdz) <sub>2</sub> (tpbn)(H <sub>2</sub> O) <sub>2</sub> ]·2C <sub>2</sub> H <sub>5</sub> OH} <sub>n</sub> | 0.168                       | 16               |
| Micro-Cu <sub>4</sub> I <sub>4</sub> -MOF                                                                                     | 0.13                        | 17               |
| <b>Compound 1</b>                                                                                                             | 1.15                        | <i>This work</i> |

**Table S4. The Langmuir and Freundlich parameters for iodine adsorption on compound 1.**

| Langmuir                             |                                      |                | Freundlich                           |             |                |
|--------------------------------------|--------------------------------------|----------------|--------------------------------------|-------------|----------------|
| Q <sub>m</sub> (mg g <sup>-1</sup> ) | k <sub>L</sub> (L mg <sup>-1</sup> ) | R <sup>2</sup> | k <sub>F</sub> (mg g <sup>-1</sup> ) | n           | R <sup>2</sup> |
| <b>1050.18</b>                       | <b>0.017</b>                         | <b>0.85</b>    | <b>219.41</b>                        | <b>4.54</b> | <b>0.98</b>    |

## Supporting Figures

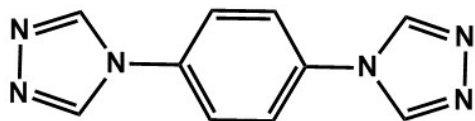

Fig. S1 The ligand p-tr<sub>2</sub>ph(1,4-phenylene-4,4'-bis(1,2,4-triazole)).

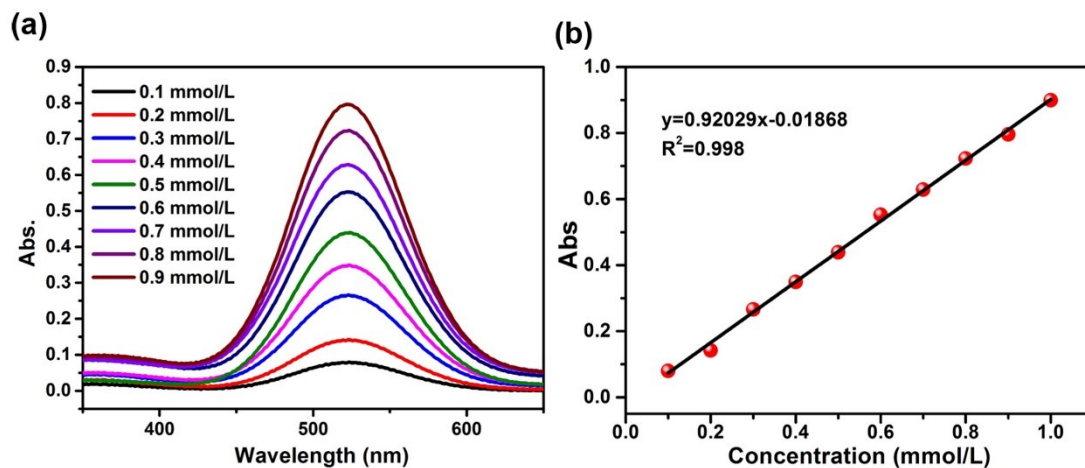

Fig. S2 (a) UV-Vis spectra of iodine in cyclohexane; (b) The standard curve of iodine in cyclohexane.

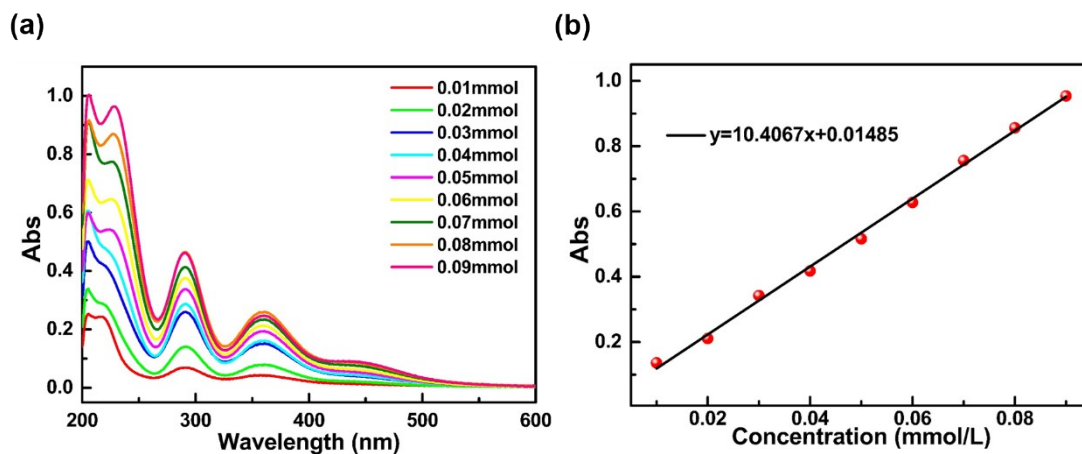

Fig. S3 (a) UV-Vis spectra of iodine in ethanol; (b) The standard curve of iodine in ethanol.

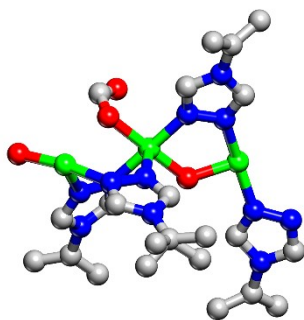

**Fig. S4** The asymmetric structural motif of compound **1**.

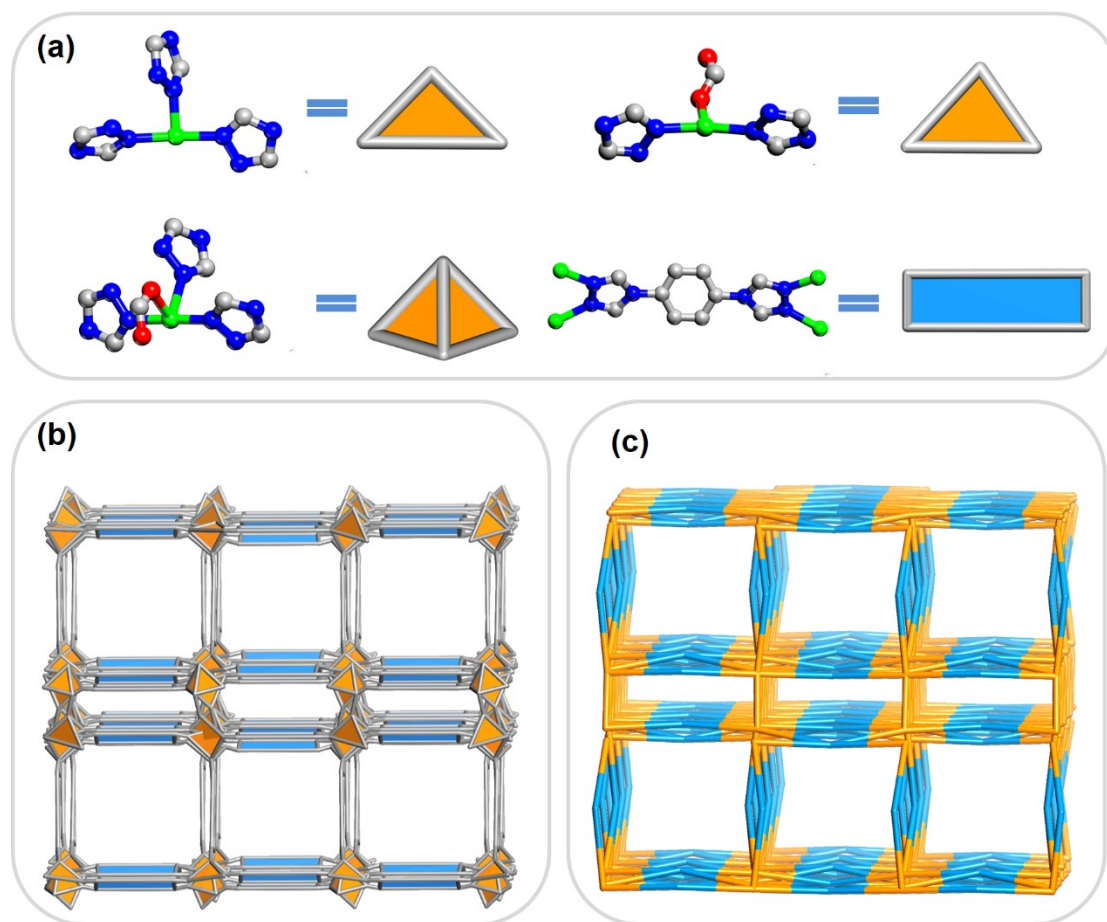

**Fig. S5** Single-crystal structure of compound **1**: (a) quaternary SBUs consisting of ligand and metal cores, (b) Polyhedral view of the framework, (c) The new type of topology.

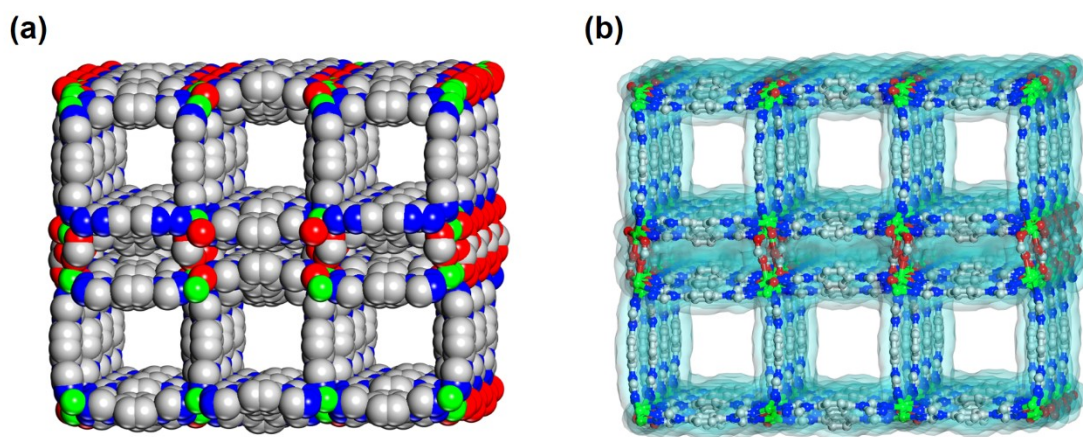

**Fig. S6** (a) Space-filling models of compound **1** along  $[100]$  direction, (b) The illustration of multiple pores for compound **1** displayed by Connolly surface areas.

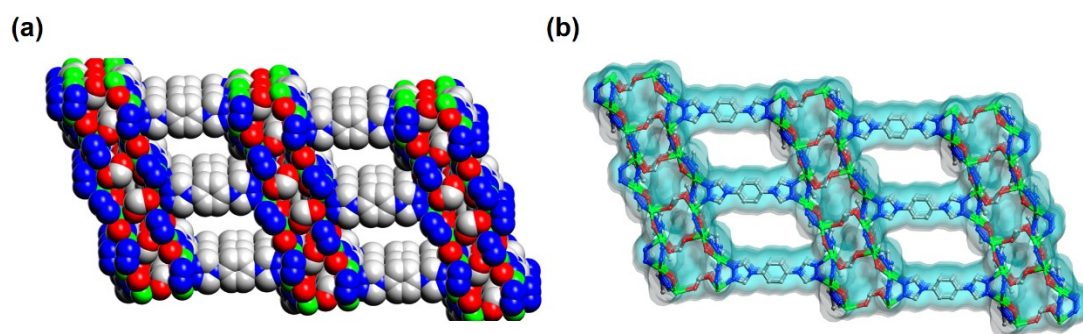

**Fig. S7** (a) Space-filling models of compound **1** along  $[010]$  direction, (b) The illustration of multiple pores for compound **1** displayed by Connolly surface areas.

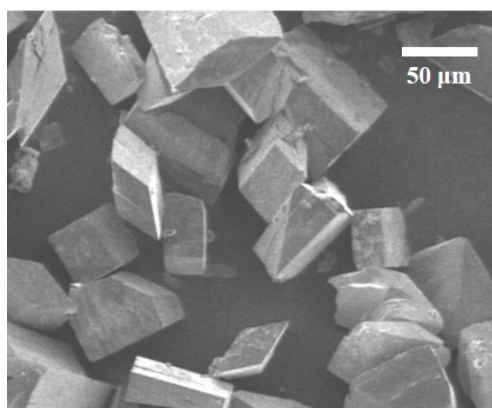

**Fig. S8** The SEM image of the compound **1**.



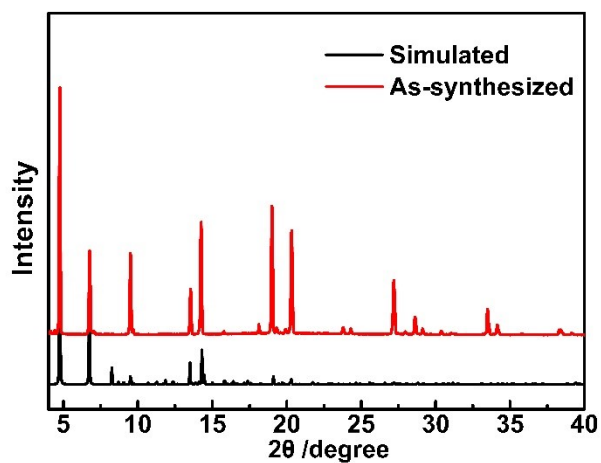

Fig. S9 PXR D patterns of compound 1 for the simulated and as-synthesized.

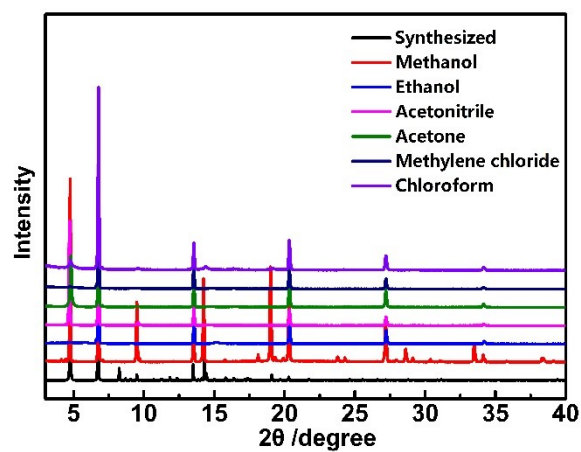

Fig. S10 PXR D patterns of compound 1 for different solvent-exchanged samples.

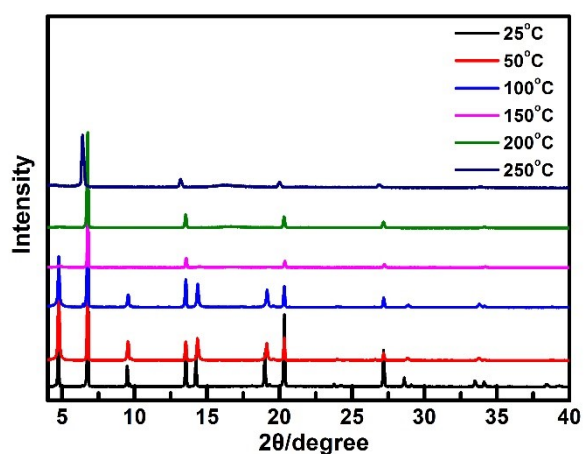

Fig. S11 Variable-temperature PXR D patterns of compound 1.

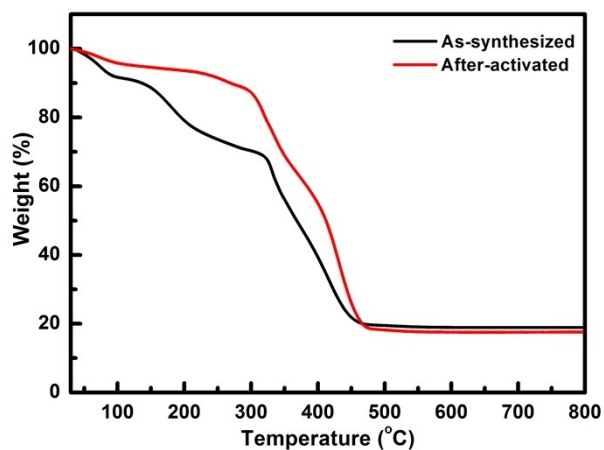

**Fig. S12** Thermogravimetric analysis curves of compound **1** for the as-synthesized and after-activated samples.

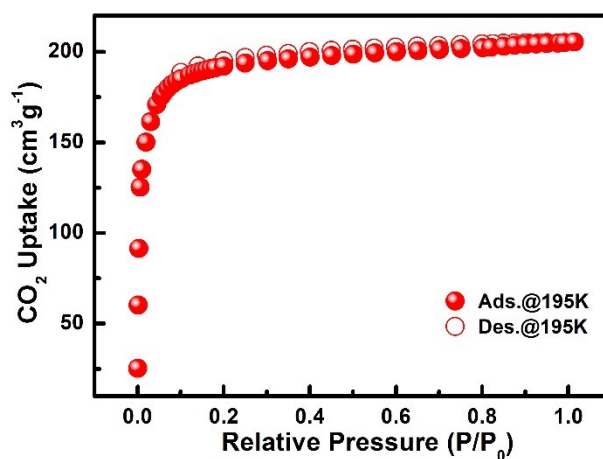

**Fig. S13** 195 K CO<sub>2</sub> sorption isotherms for compound **1**.

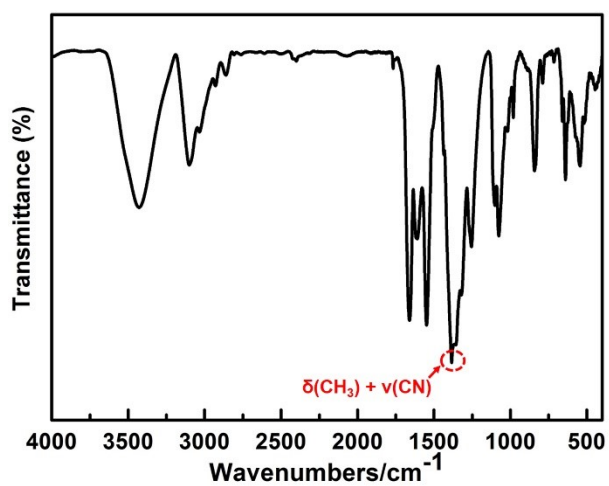

**Fig. S14** FTIR spectrum of compound **1**.

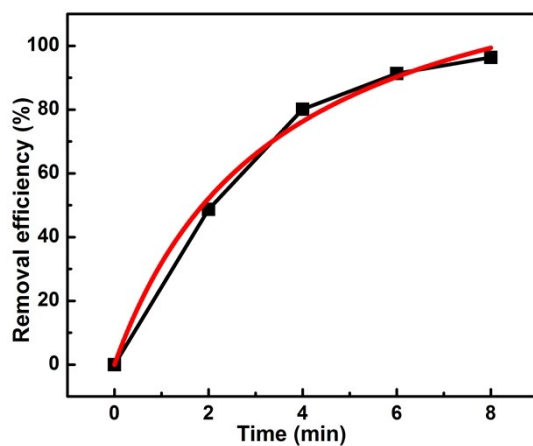

Fig. S15 Plots of pseudo-second-order kinetics.

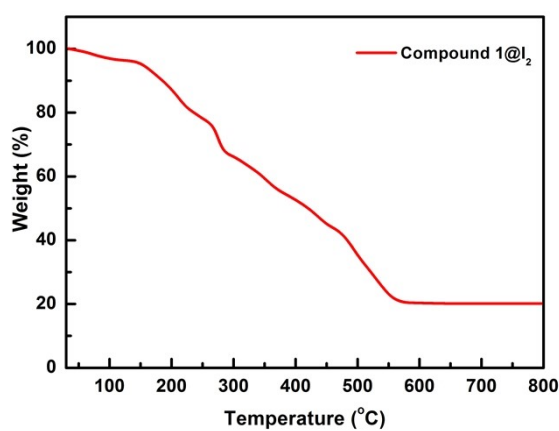

Fig. S16 Thermogravimetric analysis curves of  $I_2$ -adsorbed samples.

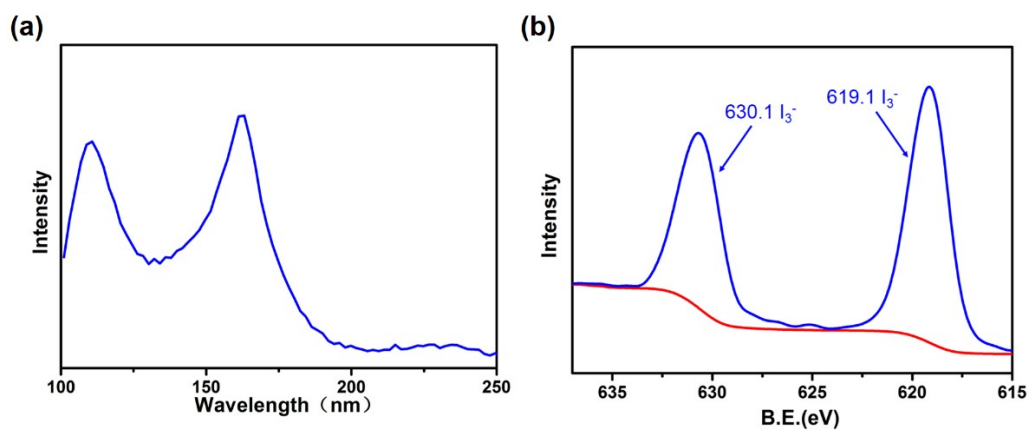

Fig. S17 (a) Raman and (b) XPS spectra of compound **1** after  $I_2$  adsorption.

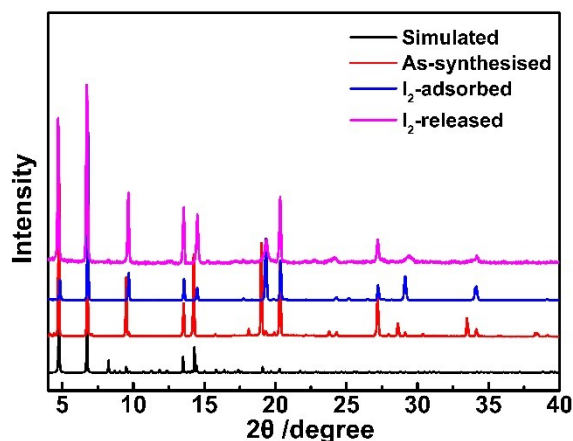

**Fig. S18** PXRD patterns of compound **1** for simulated, as-synthesized, I<sub>2</sub>-adsorbed and after cycles samples.

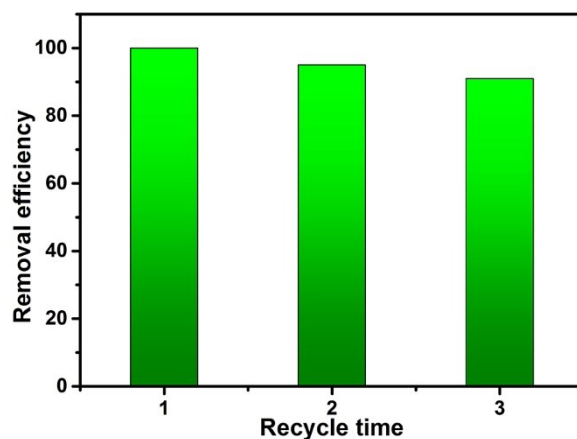

**Fig. S19** Number of iodine adsorption cycles on removal efficiency of compound **1**.

## Reference

1. L. Hashemi and A. Morsali, *CrystEngComm*, 2012, **14**, 779-781.
2. A. N. Au-Duong and C. K. Lee, *Cryst. Growth Des.*, 2018, **18**, 356-363.
3. Z. Wang, Y. Huang, J. Yang, Y. Li, Q. Zhuang and J. Gu, *Dalton Trans.*, 2017, **46**, 7412-7420.
4. M. H. Zeng, Q. X. Wang, Y. X. Tan, S. Hu, H. X. Zhao, L. S. Long and M. Kurmoo, *J. Am. Chem. Soc.*, 2010, **132**, 2561-2563.
5. S. Q. Xu, T. G. Zhan, Q. Wen, Z. F. Pang and X. Zhao, *ACS Macro Lett.*, 2016, **5**, 99-102.
6. D. Chen, Y. Fu, W. Yu, G. Yu and C. Pan, *Chem. Eng.J.*, 2018, **334**, 900-906.
7. Y. Liao, J. Li and A. Thomas, *ACS Macro Lett.*, 2017, **6**, 1444-1450.
8. M. Jia, J. Li, S. Che, L. Kan, G. Li and Y. Liu, *Inorg. Chem. Front.*, 2019, **6**, 1261-1266.
9. G. Li, C. Yao, J. Wang and Y. Xu, *Scientific Reports*, 2017, **7**, 13972.
10. H. Ma, J. J. Chen, L. Tan, J. H. Bu, Y. Zhu, B. Tan and C. Zhang, *ACS Macro Lett.*, 2016, **5**, 1039-1043.
11. P. Cui, L. Ren, Z. Chen, H. Hu, B. Zhao, W. Shi and P. Cheng, *Inorg. Chem.*, 2012, **51**, 2303-2310.

12. C. Falaise, C. Volkringer, J. Facqueur, T. Bousquet, L. Gasnot and T. Loiseau, *Chem. Commun.*, 2013, **49**, 10320-10322.
13. S. Yao, X. Sun, B. Liu, R. Krishna, G. Li, Q. S. Huo and Y. L. Liu, *J. Mater. Chem. A*, 2016, **4**, 15081-15087.
14. N. X. Zhu, C. W. Zhao, J. C. Wang, Y. A. Li and Y. B. Dong, *Chem. Commun.*, 2016, **52**, 12702-12705.
15. Y. Lin, X. Jiang, S. T. Kim, S. B. Alahakoon, X. Hou, Z. Zhang, C. M. Thompson, R. A. Smaldone and C. Ke, *J. Am. Chem. Soc.*, 2017, **139**, 7172-7175.
16. A. Gogia, P. Das, and S. K. Mandal, *ACS Appl. Mater. Interfaces*, 2020, **12**, 46107-46118.
17. X. Zhang, I. da Silva, H. G. W. Godfrey, S. K. Callear, S. A. Sapchenko, Y. Cheng, I. Vitórica-Yrezábal, M. D. Frogley, G. Cinque, C. C. Tang, C. Giacobbe, C. Dejoie, S. Rudić, A. J. Ramirez-Cuesta, M. A. Denecke, S. Yang and M. Schröder, *J. Am. Chem. Soc.*, 2017, **139**, 16289-16296.
